# Supplementary material for: Knowledge, attitudes and practices with regard to schistosomiasis prevention and control: Two cross-sectional household surveys before and after a Community Dialogue intervention in Nampula province, Mozambique
Source: PLOS journal article supplement (doi:10.1371/journal.pntd.0007138), 2019-02-07
Supplement: S2 (10.1371/journal.pntd.0007138.s002) [file journal.pntd.0007138.s002]

## KAP Survey – Schistosomiasis Prevention and Control in Nampula Province, Mozambique

### Section 1: Identification

|                 |                                                                                            |                  |                                           |
|-----------------|--------------------------------------------------------------------------------------------|------------------|-------------------------------------------|
| Cluster code:   | <input type="text"/> <input type="text"/>                                                  | Household code:  | <input type="text"/> <input type="text"/> |
| Interviewer ID: | <input type="text"/> <input type="text"/>                                                  | Date: (dd/mm/yy) | ____/____/____                            |
| Start time:     | Respondent's gender: <input type="text"/> <input type="text"/><br>01 = Male<br>02 = Female |                  |                                           |

### Section 2: Interviewee and Household Details

|    | QUESTIONS AND INSTRUCTIONS                           | CODING CATEGORIES                                                                                                                                                                                                                                                                                   | SKIP |
|----|------------------------------------------------------|-----------------------------------------------------------------------------------------------------------------------------------------------------------------------------------------------------------------------------------------------------------------------------------------------------|------|
| Q1 | <b>How old are you?</b><br><br>SINGLE RESPONSE       | 0-17 years..... 01<br>18-25 years..... 02<br>26-35 years..... 03<br>36-45 years..... 04<br>46-55 years..... 05<br>56-65 years..... 06<br>Over 65 years ..... 07<br><br>Don't know..... 88<br>No answer ..... 99                                                                                     |      |
| Q2 | <b>What is your religion?</b><br><br>SINGLE RESPONSE | None..... 01<br>Christian (Protestant)..... 02<br>Christian (Roman Catholic) ..... 03<br>Christian (Pentecostal) ..... 04<br>Christian (Seventh Day Adventist) ..... 05<br>Muslim ..... 06<br>Hindu..... 07<br>Other ..... 08<br><br>Specify: _____<br><br>Don't know..... 88<br>No answer ..... 99 |      |

|    | QUESTIONS AND INSTRUCTIONS                                                                      | CODING CATEGORIES                                                                                                                                                                                                                                                                                                                                                                                                                                                                                                                                                                                          | SKIP |
|----|-------------------------------------------------------------------------------------------------|------------------------------------------------------------------------------------------------------------------------------------------------------------------------------------------------------------------------------------------------------------------------------------------------------------------------------------------------------------------------------------------------------------------------------------------------------------------------------------------------------------------------------------------------------------------------------------------------------------|------|
| Q3 | <p><b>What is your relationship with the head of this household?</b></p> <p>SINGLE RESPONSE</p> | <p>Head of household..... 01</p> <p>Spouse..... 02</p> <p>Son/daughter ..... 03</p> <p>Stepchild ..... 04</p> <p>Adopted/foster child..... 05</p> <p>Son-in-law/daughter-in-law ..... 06</p> <p>Grandchild..... 07</p> <p>Parent..... 08</p> <p>Stepparent ..... 09</p> <p>Parent-in-law ..... 10</p> <p>Brother/sister..... 11</p> <p>Brother-in-law/sister-in-law ..... 12</p> <p>Nephew/niece..... 13</p> <p>No relation ..... 14</p> <p>Other ..... 15</p> <p>Specify: _____</p> <p>Don't know..... 88</p> <p>No answer ..... 99</p>                                                                   |      |
| Q4 | <p><b>What is your main occupation?</b></p> <p>SINGLE RESPONSE</p>                              | <p>None..... 01</p> <p>Public sector employee (professional)..... 02</p> <p>Public sector employee (manual) ..... 03</p> <p>Private sector employee (professional) ..... 04</p> <p>Private sector employee (manual)..... 05</p> <p>Self-employed (business) ..... 06</p> <p>Self-employed (agriculture/fishery)..... 07</p> <p>Domestic work in household ..... 08</p> <p>Religious leader..... 09</p> <p>Teacher ..... 10</p> <p>Student..... 11</p> <p>Jobless..... 12</p> <p>Incapacitated ..... 13</p> <p>Other ..... 14</p> <p>Specify: _____</p> <p>Don't know..... 88</p> <p>No answer ..... 99</p> |      |

|    | QUESTIONS AND INSTRUCTIONS                                                                                                                                                                               | CODING CATEGORIES                                                                                                                                                                                                                                                                                                                                                                                                                            |                  |                          |                         | SKIP |
|----|----------------------------------------------------------------------------------------------------------------------------------------------------------------------------------------------------------|----------------------------------------------------------------------------------------------------------------------------------------------------------------------------------------------------------------------------------------------------------------------------------------------------------------------------------------------------------------------------------------------------------------------------------------------|------------------|--------------------------|-------------------------|------|
| Q5 | <p><b>What is the highest level of education you have completed?</b></p> <p>SINGLE RESPONSE</p>                                                                                                          | None..... 01<br>Started but did not complete primary ..... 02<br>Primary..... 03<br>Secondary ..... 04<br><i>Médio</i> ..... 05<br>Technical course – short duration ..... 06<br>Professional course ..... 07<br>University ..... 08<br>Other ..... 12<br><br>Specify: _____<br><br>Don't know..... 88<br>No answer ..... 99                                                                                                                 |                  |                          |                         |      |
| Q6 | <p><b>Does your household have any of the following assets?</b></p> <p>ASK ABOUT EACH OF THE ASSESTS AND CIRCLE "YES" IF THEY OWN IT OR "NO" IF THEY DO NOT</p>                                          | <p><u>Yes</u></p>                                                                                                                                                                                                                                                                                                                                                                                                                            | <p><u>No</u></p> | <p><u>Don't know</u></p> | <p><u>No answer</u></p> |      |
|    |                                                                                                                                                                                                          | Radio ..... 01                                                                                                                                                                                                                                                                                                                                                                                                                               | 02               | 88                       | 99                      |      |
|    |                                                                                                                                                                                                          | Television ..... 01                                                                                                                                                                                                                                                                                                                                                                                                                          | 02               | 88                       | 99                      |      |
|    |                                                                                                                                                                                                          | DVD player ..... 01                                                                                                                                                                                                                                                                                                                                                                                                                          | 02               | 88                       | 99                      |      |
|    |                                                                                                                                                                                                          | Mobile phone/landline. 01                                                                                                                                                                                                                                                                                                                                                                                                                    | 02               | 88                       | 99                      |      |
|    |                                                                                                                                                                                                          | Motor bike ..... 01                                                                                                                                                                                                                                                                                                                                                                                                                          | 02               | 88                       | 99                      |      |
| Q7 | <p><b>What sources of water does your household use, for example for drinking or washing clothes?</b></p> <p>MULTIPLE RESPONSES POSSIBLE<br/>CIRCLE ALL MENTIONED</p> <p>PROBE TWICE: ANYTHING ELSE?</p> | Water channeled from house to house ..... 01<br>Public fountain ..... 02<br>Unprotected well ..... 03<br>Protected well..... 04<br>Unprotected fountain ..... 05<br>Protected fountain..... 06<br>Bore hole..... 07<br>River ..... 08<br>Lagoon..... 09<br>Rain water ..... 10<br>Bottled water ..... 11<br>Tanker-truck..... 12<br>Cistern ..... 13<br>Other ..... 14<br><br>Specify: _____<br><br>Don't know..... 88<br>No answer ..... 99 |                  |                          |                         |      |

|    | QUESTIONS AND INSTRUCTIONS                                                                                    | CODING CATEGORIES                                                                                                                                                                                                          | SKIP |
|----|---------------------------------------------------------------------------------------------------------------|----------------------------------------------------------------------------------------------------------------------------------------------------------------------------------------------------------------------------|------|
| Q8 | <p><b>What kind of toilet facility do members of your household typically use?</b></p> <p>SINGLE RESPONSE</p> | <p>Pit latrine..... 01</p> <p>Conventional latrine..... 02</p> <p>Improved latrine ..... 03</p> <p>Bush/field ..... 04</p> <p>Other ..... 05</p> <p>Specify: _____</p> <p>Don't know..... 88</p> <p>No answer ..... 99</p> |      |

### Section 3: Schistosomiasis

|     | QUESTIONS AND FILTERS                                                                                                                                                | CODING CATEGORIES                                                                                                                                                                                                                                                                                                                                                                                                                                                | SKIP                                   |
|-----|----------------------------------------------------------------------------------------------------------------------------------------------------------------------|------------------------------------------------------------------------------------------------------------------------------------------------------------------------------------------------------------------------------------------------------------------------------------------------------------------------------------------------------------------------------------------------------------------------------------------------------------------|----------------------------------------|
| Q9  | <p><b>Have you heard of schistosomiasis?</b></p> <p>SINGLE RESPONSE</p>                                                                                              | <p>Yes .....01</p> <p>No .....02</p> <p>Don't know .....88</p> <p>No answer .....99</p>                                                                                                                                                                                                                                                                                                                                                                          | <p>→ END</p> <p>→ END</p> <p>→ END</p> |
| Q10 | <p><b>In the last six months, where did you hear about it?</b></p> <p>MULTIPLE RESPONSES POSSIBLE</p> <p>CIRCLE ALL MENTIONED</p> <p>PROBE TWICE: ANYTHING ELSE?</p> | <p>Not heard about schistosomiasis in the last six months .....01</p> <p>Health professional .....02</p> <p>APE .....03</p> <p>Treatment campaign .....04</p> <p>Community meeting.....05</p> <p>School .....06</p> <p>Radio/TV .....07</p> <p>Newspaper .....08</p> <p>Political leader .....09</p> <p>Relative/friend/neighbour.....10</p> <p>Poster .....11</p> <p>Other .....12</p> <p>Specify: _____</p> <p>Don't know .....88</p> <p>No answer .....99</p> |                                        |

|            | QUESTIONS AND FILTERS                                                                                                                        | CODING CATEGORIES                                                                                                                                                                                                                                                                                                                                                                                                                                                                                                                                                         | SKIP                                   |
|------------|----------------------------------------------------------------------------------------------------------------------------------------------|---------------------------------------------------------------------------------------------------------------------------------------------------------------------------------------------------------------------------------------------------------------------------------------------------------------------------------------------------------------------------------------------------------------------------------------------------------------------------------------------------------------------------------------------------------------------------|----------------------------------------|
| <b>Q11</b> | <p><b>How do you get schistosomiasis?</b></p> <p>MULTIPLE RESPONSES POSSIBLE<br/>CIRCLE ALL MENTIONED</p> <p>PROBE TWICE: ANYTHING ELSE?</p> | <p>Fetching contaminated water .....01</p> <p>Drinking contaminated water.....02</p> <p>Fishing in infected water .....03</p> <p>Eating unwashed food.....04</p> <p>Poor hygiene/sanitation habits .....05</p> <p>Bathing/swimming in the river .....06</p> <p>Working in rice/agriculture fields .....07</p> <p>Sexual contact .....08</p> <p>Food/sharing plates .....09</p> <p>Urinating in contaminated places .....10</p> <p>Spontaneously/not transmitted .....11</p> <p>Other .....12</p> <p>Specify: _____</p> <p>Don't know .....88</p> <p>No answer .....99</p> |                                        |
| <b>Q12</b> | <p><b>Can an infected person contribute towards spreading schistosomiasis?</b></p> <p>SINGLE RESPONSE</p>                                    | <p>Yes .....01</p> <p>No .....02</p> <p>Don't know .....88</p> <p>No answer .....99</p>                                                                                                                                                                                                                                                                                                                                                                                                                                                                                   | <p>→ Q14</p> <p>→ Q14</p> <p>→ Q14</p> |
| <b>Q13</b> | <p><b>How?</b></p> <p>MULTIPLE RESPONSES POSSIBLE<br/>CIRCLE ALL MENTIONED</p> <p>PROBE ONCE: ANYTHING ELSE?</p>                             | <p>Infected person urinating by water .....01</p> <p>Infected person defecating by water .....02</p> <p>Infected person has sex/unprotected sex with uninfected person .....03</p> <p>Other .....04</p> <p>Specify: _____</p> <p>Don't know .....88</p> <p>No answer .....99</p>                                                                                                                                                                                                                                                                                          |                                        |

|            | QUESTIONS AND FILTERS                                                                                                                                              | CODING CATEGORIES                                                                                                                                                                                                                                                                                                                                                                                                                                                                        | SKIP                                   |
|------------|--------------------------------------------------------------------------------------------------------------------------------------------------------------------|------------------------------------------------------------------------------------------------------------------------------------------------------------------------------------------------------------------------------------------------------------------------------------------------------------------------------------------------------------------------------------------------------------------------------------------------------------------------------------------|----------------------------------------|
| <b>Q14</b> | <p><b>Do you know how you can avoid getting schistosomiasis?</b></p> <p>MULTIPLE RESPONSES POSSIBLE<br/>CIRCLE ALL MENTIONED</p> <p>PROBE ONCE: ANYTHING ELSE?</p> | <p>Treatment for all infected persons.....01</p> <p>Treat all people.....02</p> <p>Treatment of the water source .....03</p> <p>Protect the water source.....04</p> <p>No swimming.....05</p> <p>Use well or pump water .....06</p> <p>More latrines/better hygiene.....07</p> <p>Don't have sex/unprotected sex with infected person .....08</p> <p>Sexual fidelity/abstinence .....09</p> <p>Others.....10</p> <p>Specify:_____</p> <p>Don't know .....88</p> <p>No answer .....99</p> |                                        |
| <b>Q15</b> | <p><b>What are the possible symptoms of schistosomiasis?</b></p> <p>MULTIPLE RESPONSES POSSIBLE<br/>CIRCLE ALL MENTIONED</p> <p>PROBE ONCE: ANYTHING ELSE?</p>     | <p>Painful urination .....1</p> <p>Frequent urination .....2</p> <p>Blood in urine .....3</p> <p>Blood in stool.....4</p> <p>Fatigue.....5</p> <p>Fever.....6</p> <p>Headache.....7</p> <p>Swollen stomach .....8</p> <p>Diarrhea .....9</p> <p>Nausea/vomiting .....10</p> <p>Rash/itch.....11</p> <p>Weight loss .....12</p> <p>Other .....13</p> <p>Specify:_____</p> <p>Don't know .....88</p> <p>No answer .....99</p>                                                              | <p>→ Q19</p> <p>→ Q19</p>              |
| <b>Q16</b> | <p><b>If you have any of these symptoms, would you seek help?</b></p> <p>SINGLE RESPONSE</p>                                                                       | <p>Yes .....01</p> <p>No .....02</p> <p>Don't know .....88</p> <p>No answer .....99</p>                                                                                                                                                                                                                                                                                                                                                                                                  | <p>→ Q18</p> <p>→ Q19</p> <p>→ Q19</p> |

|            | QUESTIONS AND FILTERS                                                                                                                                                                        | CODING CATEGORIES                                                                                                                                                                                                                                                                                                                                                           | SKIP                                                                                            |
|------------|----------------------------------------------------------------------------------------------------------------------------------------------------------------------------------------------|-----------------------------------------------------------------------------------------------------------------------------------------------------------------------------------------------------------------------------------------------------------------------------------------------------------------------------------------------------------------------------|-------------------------------------------------------------------------------------------------|
| <b>Q17</b> | <b>Who would you ask for help?</b><br><br>MULTIPLE RESPONSES POSSIBLE<br>CIRCLE ALL MENTIONED<br><br>PROBE ONCE: ANYONE ELSE?                                                                | School teacher .....01<br>Community leader .....02<br>Traditional healer .....03<br>Pharmacy/drug vendor .....04<br>APE/ACE/community volunteer .....05<br>Women's group leader .....06<br>Religious leader .....07<br>Health worker/health facility .....08<br>Family member .....09<br>Other .....10<br><br>Specify: _____<br><br>Don't know .....88<br>No answer .....99 | → Q19<br>→ Q19 |
| <b>Q18</b> | <b>Why not?</b><br><br>MULTIPLE RESPONSES POSSIBLE<br>CIRCLE ALL MENTIONED<br><br>PROBE ONCE: ANY OTHER REASON?                                                                              | I don't know who to consult .....01<br>I have no money .....02<br>I am not concerned about the symptoms .....03<br>I never seek medical help .....04<br>Other .....05<br><br>Specify: _____<br><br>Don't know .....88<br>No answer .....99                                                                                                                                  |                                                                                                 |
| <b>Q19</b> | <b>Do you know if there is a drug that treats schistosomiasis?</b><br><br>SINGLE RESPONSE                                                                                                    | Yes, there is .....01<br>No, there isn't .....02<br><br>Don't know .....88<br>No answer .....99                                                                                                                                                                                                                                                                             | → Q22<br>→ Q22<br>→ Q22                                                                         |
| <b>Q20</b> | <b>Do you know the name of the drug?</b><br><br>SINGLE RESPONSE<br><br>IF RESPONDENT DOES NOT KNOW THE NAME OF THE DRUG, SAY "THE DRUG USED TO TREAT SCHISTOSOMIASIS IS CALLED PRAZIQUANTEL" | Yes, I know the name .....01<br>No, I don't know the name .....02<br><br>Don't know .....88<br>No answer .....99                                                                                                                                                                                                                                                            | → Q22<br>→ Q22<br>→ Q22                                                                         |
| <b>Q21</b> | <b>What is the name of the drug?</b><br><br>NOTE RESPONDENT'S ANSWER<br><br>IF RESPONDENT DOES NOT NAME PRAZIQUANTEL, SAY "THE DRUG USED TO TREAT SCHISTOSOMIASIS IS CALLED PRAZIQUANTEL."   |                                                                                                                                                                                                                                                                                                                                                                             |                                                                                                 |

|            | QUESTIONS AND FILTERS                                                                                                                                                 | CODING CATEGORIES                                                                                                                                                                                                                                                                                                                                                                                                                                                                                                                             | SKIP                                                                                                                                                                     |
|------------|-----------------------------------------------------------------------------------------------------------------------------------------------------------------------|-----------------------------------------------------------------------------------------------------------------------------------------------------------------------------------------------------------------------------------------------------------------------------------------------------------------------------------------------------------------------------------------------------------------------------------------------------------------------------------------------------------------------------------------------|--------------------------------------------------------------------------------------------------------------------------------------------------------------------------|
| <b>Q22</b> | <p>SHOW SAMPLE TABLETS</p> <p><b>This is Praziquantel. It is used for treatment of schistosomiasis. Have you ever taken these tablets?</b></p> <p>SINGLE RESPONSE</p> | <p>Yes .....01</p> <p>No .....02</p> <p>Don't know .....88</p> <p>No answer .....99</p>                                                                                                                                                                                                                                                                                                                                                                                                                                                       | <p>→ Q27</p> <p>→ Q27</p> <p>→ Q27</p>                                                                                                                                   |
| <b>Q23</b> | <p><b>How did you feel after taking the medication?</b></p> <p>SINGLE RESPONSE</p>                                                                                    | <p>Felt fine .....01</p> <p>Felt slightly unwell .....02</p> <p>Felt very unwell .....03</p> <p>Don't know .....88</p> <p>No answer .....99</p>                                                                                                                                                                                                                                                                                                                                                                                               |                                                                                                                                                                          |
| <b>Q24</b> | <p><b>Have you ever received Praziquantel through a treatment campaign?</b></p> <p>SINGLE RESPONSE</p>                                                                | <p>Yes .....01</p> <p>No .....02</p> <p>Don't know .....88</p> <p>No answer .....99</p>                                                                                                                                                                                                                                                                                                                                                                                                                                                       | <p>→ Q26</p> <p>→ Q27</p> <p>→ Q27</p>                                                                                                                                   |
| <b>Q25</b> | <p><b>Why not?</b></p> <p>MULTIPLE RESPONSES POSSIBLE<br/>CIRCLE ALL MENTIONED</p> <p>PROBE ONCE: ANY OTHER REASON?</p>                                               | <p>There was no campaign in my community .....01</p> <p>Did not know about the campaign .....02</p> <p>I wasn't offered the drug/the drugs were out-of-stock .....03</p> <p>I was not eligible .....04</p> <p>I was not ill .....05</p> <p>It was not convenient .....06</p> <p>I was scared of side effects .....07</p> <p>Drugs don't work .....08</p> <p>I prefer traditional medicine .....09</p> <p>Did not trust distributors .....10</p> <p>Other .....11</p> <p>Specify: _____</p> <p>Don't know .....88</p> <p>No answer .....99</p> | <p>→ Q27</p> |
| <b>Q26</b> | <p><b>Would you take Praziquantel again if there was another campaign?</b></p> <p>SINGLE RESPONSE</p>                                                                 | <p>Yes .....01</p> <p>No .....02</p> <p>Don't know .....88</p> <p>No answer .....99</p>                                                                                                                                                                                                                                                                                                                                                                                                                                                       | <p>→ Q29</p> <p>→ Q28</p> <p>→ Q29</p> <p>→ Q29</p>                                                                                                                      |
| <b>Q27</b> | <p><b>Would you take Praziquantel if offered to you through a treatment campaign?</b></p> <p>SINGLE RESPONSE</p>                                                      | <p>Yes .....01</p> <p>No .....02</p> <p>Don't know .....88</p> <p>No answer .....99</p>                                                                                                                                                                                                                                                                                                                                                                                                                                                       | <p>→ Q29</p> <p>→ Q29</p> <p>→ Q29</p>                                                                                                                                   |



|     | QUESTIONS AND FILTERS                                                                                                      | CODING CATEGORIES                                                                                                                                                                                                                                                                                | SKIP                                                        |
|-----|----------------------------------------------------------------------------------------------------------------------------|--------------------------------------------------------------------------------------------------------------------------------------------------------------------------------------------------------------------------------------------------------------------------------------------------|-------------------------------------------------------------|
| Q28 | <b>Why not?</b><br><br>MULTIPLE RESPONSES POSSIBLE<br>CIRCLE ALL MENTIONED<br><br>PROBE ONCE: ANY OTHER REASON?            | Would only take if I'm ill .....01<br>It's not convenient.....02<br>Scared of side effects .....03<br>Drugs don't work .....04<br>I prefer traditional medicine .....05<br>Don't trust distributors.....06<br>Other .....07<br><br>Specify: _____<br><br>Don't know .....88<br>No answer .....99 |                                                             |
| Q29 | <b>How many children under the age of 18 live in your household?</b><br><br>SINGLE RESPONSE                                | None .....01<br>One .....02<br>Two .....03<br>Three .....04<br>Four .....05<br>Five .....06<br>Six .....07<br>Seven .....08<br>More than seven .....09<br><br>Don't know .....88<br>No answer .....99                                                                                            | → Q37<br><br><br><br><br><br><br><br><br><br>→ Q37<br>→ Q37 |
| Q30 | <b>Have any of them ever taken Praziquantel?</b><br><br>SINGLE RESPONSE                                                    | Yes .....01<br>No .....02<br><br>Don't know .....88<br>No answer .....99                                                                                                                                                                                                                         | → Q35<br><br>→ Q35<br>→ Q35                                 |
| Q31 | <b>Did any of them ever feel unwell after taking the medication?</b><br><br>SINGLE RESPONSE                                | Yes .....01<br>No .....02<br><br>Don't know .....88<br>No answer .....99                                                                                                                                                                                                                         |                                                             |
| Q32 | <b>Did any of the children in your household receive Praziquantel through a treatment campaign?</b><br><br>SINGLE RESPONSE | Yes .....01<br>No .....02<br><br>Don't know .....88<br>No answer .....99                                                                                                                                                                                                                         | → Q34<br><br>→ Q35<br>→ Q35                                 |

|     | QUESTIONS AND FILTERS                                                                                                       | CODING CATEGORIES                                                                                                                                                                                                                                                                                                                                                                                                                                                                                       | SKIP                                                                                                                                                  |
|-----|-----------------------------------------------------------------------------------------------------------------------------|---------------------------------------------------------------------------------------------------------------------------------------------------------------------------------------------------------------------------------------------------------------------------------------------------------------------------------------------------------------------------------------------------------------------------------------------------------------------------------------------------------|-------------------------------------------------------------------------------------------------------------------------------------------------------|
| Q33 | <b>Why not?</b><br><br>MULTIPLE RESPONSES POSSIBLE<br>CIRCLE ALL MENTIONED<br><br>PROBE ONCE: ANY OTHER REASON?             | There was no campaign in my community .....01<br>Did not know about the campaign .....02<br>They weren't offered the drug/the drugs were<br>out-of-stock .....03<br>They were not eligible .....04<br>They were not ill .....05<br>It was not convenient .....06<br>I was scared of side effects.....07<br>Drugs don't work .....08<br>I prefer traditional medicine .....09<br>Did not trust distributors.....10<br>Other .....11<br><br>Specify: _____<br><br>Don't know .....88<br>No answer .....99 | → Q35<br>→ Q35 |
| Q34 | <b>Would you want your children to take Praziquantel again if there was another campaign?</b><br><br>SINGLE RESPONSE        | Yes .....01<br>No .....02<br><br>Don't know .....88<br>No answer .....99                                                                                                                                                                                                                                                                                                                                                                                                                                | → Q37<br>→ Q36<br><br>→ Q37<br>→ Q37                                                                                                                  |
| Q35 | <b>Would you want your children to receive Praziquantel if offered through a treatment campaign?</b><br><br>SINGLE RESPONSE | Yes .....01<br>No .....02<br><br>Don't know .....88<br>No answer .....99                                                                                                                                                                                                                                                                                                                                                                                                                                | → Q37<br><br>→ Q37<br>→ Q37                                                                                                                           |
| Q36 | <b>Why not?</b><br><br>MULTIPLE RESPONSES POSSIBLE<br>CIRCLE ALL MENTIONED<br><br>PROBE ONCE: ANY OTHER REASON?             | Children should only receive treatment if they<br>are ill .....01<br>It's not convenient.....02<br>Scared of side effects .....03<br>Drugs don't work .....04<br>I prefer traditional medicine .....05<br>Don't trust distributors.....06<br>Other .....07<br><br>Specify: _____<br><br>Don't know .....88<br>No answer .....99                                                                                                                                                                         |                                                                                                                                                       |

|            | QUESTIONS AND FILTERS                                                                                                                                                                                                                                                                                                                                                                        | CODING CATEGORIES                                                                                                                                                                                                                                                                                                                                                                                                                                                     | SKIP                                                                                                    |
|------------|----------------------------------------------------------------------------------------------------------------------------------------------------------------------------------------------------------------------------------------------------------------------------------------------------------------------------------------------------------------------------------------------|-----------------------------------------------------------------------------------------------------------------------------------------------------------------------------------------------------------------------------------------------------------------------------------------------------------------------------------------------------------------------------------------------------------------------------------------------------------------------|---------------------------------------------------------------------------------------------------------|
| <b>Q37</b> | <p><b>Do you agree with the following statements?</b></p> <p><b>My household is affected by schistosomiasis.</b></p> <p><b>Schistosomiasis is a matter of concern for me.</b></p> <p><b>Schistosomiasis can have long-term consequences for my health.</b></p> <p><b>Praziquantel is the best cure for schistosomiasis.</b></p> <p>CIRCLE RESPONDENT'S REPLY FOR EACH OF THE STATEMENTS.</p> | <p><u>Yes</u>                      <u>No</u>                      <u>Don't know</u>                      <u>No answer</u></p> <p>01                      02                      88                      99</p> <p>01                      02                      88                      99</p> <p>01                      02                      88                      99</p> <p>01                      02                      88                      88</p> |                                                                                                         |
| <b>Q38</b> | <p><b>Do you do anything to protect you and your household from schistosomiasis?</b></p> <p>SINGLE RESPONSE</p>                                                                                                                                                                                                                                                                              | <p>Yes .....01</p> <p>No .....02</p> <p>Don't know .....88</p> <p>No answer .....99</p>                                                                                                                                                                                                                                                                                                                                                                               | <p>→ Q40</p> <p>→ END</p> <p>→ END</p>                                                                  |
| <b>Q39</b> | <p><b>What do you do?</b></p> <p>MULTIPLE RESPONSES POSSIBLE</p> <p>CIRCLE ALL MENTIONED</p> <p>PROBE ONCE: ANYTHING ELSE?</p>                                                                                                                                                                                                                                                               | <p>Avoid swimming or wading in contaminated water .....01</p> <p>Boil drinking water .....02</p> <p>Treat drinking water .....03</p> <p>Boil bathing water .....04</p> <p>Use latrines .....05</p> <p>Don't have sex/unprotected sex with infected person .....06</p> <p>Sexual fidelity/abstinence .....07</p> <p>Other .....08</p> <p>Specify: _____</p> <p>Don't know .....88</p> <p>No answer .....99</p>                                                         | <p>→ END</p> |
| <b>Q40</b> | <p><b>Why not?</b></p> <p>MULTIPLE RESPONSES POSSIBLE</p> <p>CIRCLE ALL MENTIONED</p> <p>PROBE ONCE: ANY OTHER REASON?</p>                                                                                                                                                                                                                                                                   | <p>Don't know what I can do .....01</p> <p>I'm not concerned about schistosomiasis .....02</p> <p>I don't have money .....03</p> <p>It is not practical .....04</p> <p>Other .....05</p> <p>Specify: _____</p> <p>Don't know .....88</p> <p>No answer .....99</p>                                                                                                                                                                                                     |                                                                                                         |

END

DO YOU HAVE ANY QUESTIONS?

THANK YOU FOR YOUR TIME.

#### Section 4: Final Result

TO BE COMPLETED BY THE FIELD RESEARCHER

|                  |                                                                                                                               |  |  |
|------------------|-------------------------------------------------------------------------------------------------------------------------------|--|--|
| <b>End time:</b> | <b>Final result code:</b> <table border="1"><tr><td></td><td></td></tr></table><br>01 = Completed<br>02 = Partially completed |  |  |
|                  |                                                                                                                               |  |  |

#### Section 5: Post-interview

TO BE COMPLETED BY SUPERVISOR

Supervisor code:

|  |  |
|--|--|
|  |  |
|--|--|

Supervisor's signature:
